# Supplementary material for: Effect of gestational diabetes and hypertensive disorders of pregnancy on postpartum cardiometabolic risk
Source: PubMed Central journal article supplement — Endocr Connect. 2018 Feb 14;7(3):433–42. doi: 10.1530/EC-17-0359 (PMC5834770; doi:10.1530/ec-17-0359), 2018-02-14
Supplement: ec-7-433-t001.pdf [file ec-7-433-t001.pdf]

**Supplementary Table 1. Associations of cumulative episodes of gestational diabetes and hypertensive disorders with postpartum maternal cardio-metabolic risks assessment (Multiple linear regression models) in original log<sub>10</sub> transformed estimates.**

| Cumulative major gestational complications |         | Postpartum cardio-metabolic risks assessment, β (95% CI) |                                    |                             |                          |                        |                         |
|--------------------------------------------|---------|----------------------------------------------------------|------------------------------------|-----------------------------|--------------------------|------------------------|-------------------------|
|                                            |         | Log <sub>10</sub> (fasting glucose)                      | Log <sub>10</sub> (2-hour glucose) | Log <sub>10</sub> (Insulin) | Log <sub>10</sub> (HOMA) | Log <sub>10</sub> (TG) | Log <sub>10</sub> (CRP) |
| <b>Cumulative GDM</b>                      |         |                                                          |                                    |                             |                          |                        |                         |
| Never<br>Once                              | Model 1 | Ref                                                      | Ref                                | Ref                         | Ref                      | Ref                    | Ref                     |
|                                            |         | <b>0.03</b>                                              | <b>0.10</b>                        | <b>0.08</b>                 | <b>0.11</b>              | 0.04                   | 0.11                    |
|                                            |         | <b>(0.01, 0.04)</b>                                      | <b>(0.07, 0.13)</b>                | <b>(0.01, 0.15)</b>         | <b>(0.03, 0.18)</b>      | (-0.02, 0.09)          | (-0.03, 0.25)           |
| Recurrent (≥2)                             |         | <b>0.03</b>                                              | <b>0.11</b>                        | 0.0003                      | 0.03                     | -0.03                  | 0.06                    |
|                                            |         | <b>(0.01, 0.05)</b>                                      | <b>(0.06, 0.16)</b>                | (-0.10, 0.10)               | (-0.08, 0.14)            | (-0.11, 0.05)          | (-0.16, 0.27)           |
| Never<br>Once                              | Model 2 | Ref                                                      | Ref                                | Ref                         | Ref                      | Ref                    | Ref                     |
|                                            |         | <b>0.02</b>                                              | <b>0.09</b>                        | 0.02                        | 0.04                     | 0.001                  | 0.01                    |
|                                            |         | <b>(0.01, 0.03)</b>                                      | <b>(0.06, 0.12)</b>                | (-0.04, 0.08)               | (-0.03, 0.10)            | (-0.05, 0.05)          | (-0.11, 0.14)           |
| Recurrent (≥2)                             |         | <b>0.03</b>                                              | <b>0.11</b>                        | -0.01                       | 0.02                     | -0.05                  | 0.05                    |
|                                            |         | <b>(0.01, 0.05)</b>                                      | <b>(0.06, 0.15)</b>                | (-0.10, 0.08)               | (-0.07, 0.12)            | (-0.13, 0.03)          | (-0.13, 0.23)           |
| Never<br>Once                              | Model 3 | Ref                                                      | Ref                                | Ref                         | Ref                      | Ref                    | Ref                     |
|                                            |         | <b>0.02</b>                                              | <b>0.09</b>                        | 0.01                        | 0.03                     | 0.01                   | 0.03                    |
|                                            |         | <b>(0.01, 0.03)</b>                                      | <b>(0.06, 0.12)</b>                | (-0.05, 0.08)               | (-0.03, 0.10)            | (-0.05, 0.06)          | (-0.10, 0.15)           |
| Recurrent (≥2)                             |         | <b>0.03</b>                                              | <b>0.12</b>                        | 0.02                        | 0.06                     | -0.03                  | 0.07                    |
|                                            |         | <b>(0.01, 0.05)</b>                                      | <b>(0.07, 0.16)</b>                | (-0.07, 0.12)               | (-0.04, 0.16)            | (-0.11, 0.05)          | (-0.12, 0.25)           |
| p trend                                    |         | <b>&lt;0.0001</b>                                        | <b>&lt;0.001</b>                   |                             |                          |                        |                         |
| <b>Gestational HDP</b>                     |         |                                                          |                                    |                             |                          |                        |                         |
| Never<br>At least once (>=1)               | Model 1 | Ref                                                      | Ref                                | Ref                         | Ref                      | Ref                    | Ref                     |
|                                            |         | 0.02                                                     | <b>0.06</b>                        | 0.06                        | 0.08                     | <b>0.09</b>            | 0.24                    |
|                                            |         | (-0.01, 0.04)                                            | <b>(0.01, 0.12)</b>                | (-0.05, 0.18)               | (-0.04, 0.21)            | <b>(0.0003, 0.18)</b>  | (-0.001, 0.48)          |
| Never<br>At least once (>=1)               | Model 2 | Ref                                                      | Ref                                | Ref                         | Ref                      | Ref                    | Ref                     |
|                                            |         | 0.005                                                    | 0.03                               | -0.01                       | -0.001                   | 0.5                    | 0.17                    |
|                                            |         | (-0.02, 0.03)                                            | (-0.03, 0.09)                      | (-0.11, 0.10)               | (-0.11, 0.11)            | (-0.04, 0.14)          | (-0.04, 0.38)           |
| Never<br>At least once (>=1)               | Model 3 | Ref                                                      | Ref                                | Ref                         | Ref                      | Ref                    | Ref                     |
|                                            |         | 0.003                                                    | 0.03                               | 0.003                       | 0.01                     | 0.04                   | 0.14                    |
|                                            |         | (-0.02, 0.03)                                            | (-0.03, 0.08)                      | (-0.10, 0.11)               | (-0.11, 0.12)            | (-0.05, 0.14)          | (-0.07, 0.35)           |

Abbreviations: CI, confidence interval; GDM, gestational diabetes mellitus; HDP, hypertensive disorder of pregnancy; SBP, systolic blood pressure; DBP, diastolic blood pressure; BMI, body mass index; waist circum, waist circumference; TG, triglyceride; HDL, high density lipoprotein; CRP, C-reactive protein.

Model 1, unadjusted;

Model 2, adjusted for mom age at enrolment, maternal ethnicity, maternal college education, and pre-pregnancy BMI;

Model 3, Model 2 + cumulative parity.
